# Supplementary material for: Sun Exposure Guidelines and Serum Vitamin D Status in Denmark: The StatusD Study
Source: PubMed Central journal article supplement (PMC4882679; doi:10.3390/nu8050266), 2016-05-05
Supplement: nutrients-08-00266-s001.pdf [file nutrients-08-00266-s001.pdf]

# Supplementary Materials: Sun Exposure Guidelines and Serum Vitamin D Status in Denmark: The StatusD Study

Louise Hansen, Anne Tjønneland, Brian Køster, Christine Brot, Rikke Andersen, Marika Lundqvist, Jane Christensen and Anja Olsen

**Table S1.** Combined effect of adherence to sun advice and time spent outside: Effect on vitamin D (nmol/L) of adherence to the four pieces of sun advice as well as the combined index in relation to total time spent outside (per hour). The estimates show the effect on vitamin D (nmol/L) per each extra hour per day spent outside in combination with sun advice and the combined index <sup>a,b</sup>.

|                                                                   | Children ( <i>n</i> = 569) |                      | Adults ( <i>n</i> = 2625) |                    |
|-------------------------------------------------------------------|----------------------------|----------------------|---------------------------|--------------------|
|                                                                   | Spring                     | Autumn               | Spring                    | Autumn             |
| <b>Adherence to sun exposure guideline on shade</b>               |                            |                      |                           |                    |
| Always                                                            | 0.28 (−1.74–2.3) *         | −0.80 (−2.53–0.95) * | 0.17 (−0.13–0.46)         | 0.078 (−0.22–0.38) |
| Often                                                             | −0.09 (−0.59–0.42) *       | −0.17 (−0.62–0.28) * | 0.063 (−0.10–0.23)        | 0.068 (−0.01–0.24) |
| Occasionally                                                      | 0.41 (0.09–0.73) *         | 0.64 (0.33–0.95) *   | 0.25 (0.11–0.39)          | 0.49 (0.35–0.63)   |
| No                                                                | −0.16 (−0.76–0.44) *       | 0.079 (−0.51–0.67) * | 0.53 (0.30–0.75)          | 0.64 (0.42–0.87)   |
| <b>Adherence to sun exposure guideline on sunhat</b>              |                            |                      |                           |                    |
| Always                                                            | 0.21 (−0.96–1.39)          | 0.75 (−0.42–1.92)    | 0.12 (−0.20–0.45)         | 0.093 (−0.24–0.43) |
| Often                                                             | 0.08 (−0.60–0.76)          | 0.37 (−0.30–1.04)    | 0.09 (−0.14–0.32)         | 0.28 (0.053–0.51)  |
| Occasionally                                                      | 0.42 (−0.16–1.00)          | 0.44 (−0.083–0.96)   | 0.37 (0.16–0.57)          | 0.51 (0.30–0.72)   |
| No                                                                | 0.25 (−0.07–0.56)          | 0.36 (0.056–0.66)    | 0.24 (0.11–0.37)          | 0.37 (0.24–0.50)   |
| <b>Adherence to sun exposure guideline on protective clothing</b> |                            |                      |                           |                    |
| Always                                                            | −0.07 (−0.80–0.66)         | −0.04 (−0.77–0.69)   | −0.22 (−0.57–0.12)        | −0.23 (−0.58–0.13) |
| Often                                                             | −0.27 (−0.87–0.34)         | 0.23 (−0.24–0.69)    | 0.055 (−0.15–0.26)        | 0.053 (−0.15–0.25) |
| Occasionally                                                      | 0.26 (−0.14–0.66)          | 0.30 (−0.10–0.69)    | 0.12 (−0.04–0.27)         | 0.27 (0.11–0.43)   |
| No                                                                | 0.41 (0.03–0.78)           | 0.61 (0.23–0.99)     | 0.42 (0.27–0.56)          | 0.60 (0.46–0.74)   |
| <b>Adherence to sun exposure guideline on sunscreen</b>           |                            |                      |                           |                    |
| Always                                                            | 0.34 (−0.02–0.71)          | 0.51 (0.18–0.84)     | 0.35 (0.14–0.55)          | 0.50 (0.30–0.71)   |
| Often                                                             | 0.21 (−0.25–0.67)          | 0.22 (−0.23–0.67)    | 0.27 (0.09–0.46)          | 0.30 (0.11–0.49)   |
| Occasionally                                                      | 0.12 (−0.34–0.57)          | 0.22 (−0.24–0.67)    | 0.27 (0.11–0.43)          | 0.35 (0.18–0.51)   |
| No                                                                | 0.19 (−1.02–1.40)          | 1.11 (−0.22–2.43)    | 0.087 (−0.08–0.26)        | 0.35 (0.18–0.52)   |
| <b>Combined sun exposure guideline index <sup>c</sup></b>         |                            |                      |                           |                    |
| 0                                                                 | 0.16 (−0.33–0.66)          | 0.47 (−0.032–0.97)   | 0.34 (0.18–0.49)          | 0.50 (0.35–0.66)   |
| 1                                                                 | 0.42 (0.05–0.78)           | 0.60 (0.25–0.96)     | 0.22 (0.059–0.39)         | 0.51 (0.34–0.68)   |
| 2                                                                 | 0.22 (−0.29–0.75)          | 0.084 (−0.39–0.56)   | 0.094 (−0.098–0.29)       | 0.11 (−0.08–0.30)  |
| 3                                                                 | −0.20 (−0.98–0.57)         | −0.066 (−0.67–0.54)  | 0.18 (−0.098–0.29)        | 0.14 (−0.01–0.38)  |
| 4                                                                 | −0.34 (−1.25–0.57)         | 0.39 (−0.51–1.29)    | −0.07 (−0.51–0.38)        | −0.25 (−0.79–0.20) |

<sup>a</sup> Analyses were adjusted for sex, age and use of supplements containing vitamin D and have "time spent outside" as an interaction variable; <sup>b</sup> *p* for interaction < 0.05 for models in spring and autumn for sun exposure guideline on shade among children only (shown with an asterisk); <sup>c</sup> The answers "always" and "often" were combined to "yes" for each exposure guideline, while "no" included "occasionally" and "no".
